# Supplementary material for: Atropos: specific, sensitive, and speedy trimming of sequencing reads
Source: PeerJ. 2017 Aug 30;5:e3720. doi: 10.7717/peerj.3720 (PMC5581536; doi:10.7717/peerj.3720)
Supplement: Supplemental Information 1 [file peerj-05-3720-s001.pdf]

# Supplement to *Atropos: specific, sensitive, and speedy trimming of sequencing reads*

John P Didion<sup>1</sup>, Marcel Martin<sup>2</sup>, and Francis S Collins<sup>1</sup>

<sup>1</sup>National Human Genome Research Institute, National Institutes of Health, Bethesda, MD

<sup>2</sup>Science for Life Laboratory, Department of Biochemistry and Biophysics, Stockholm University, Sweden

Corresponding author:

John P Didion, PhD<sup>1</sup>

Email address: john.didion@nih.gov

## 1 FIGURES

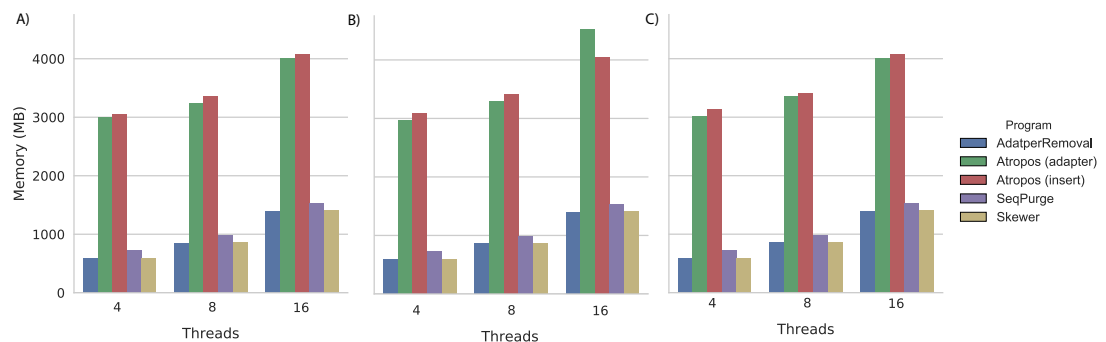

**Figure 1. Memory usage of trimming tools on simulated datasets.** Maximum memory usage, in MB, of jobs executed on our cluster for trimming tools run on simulated datasets with error rates of A) 0.2%, B) 0.6%, and C) 1.2%. Note that this memory usage includes the overhead of the Singularity container and is thus an overestimate.

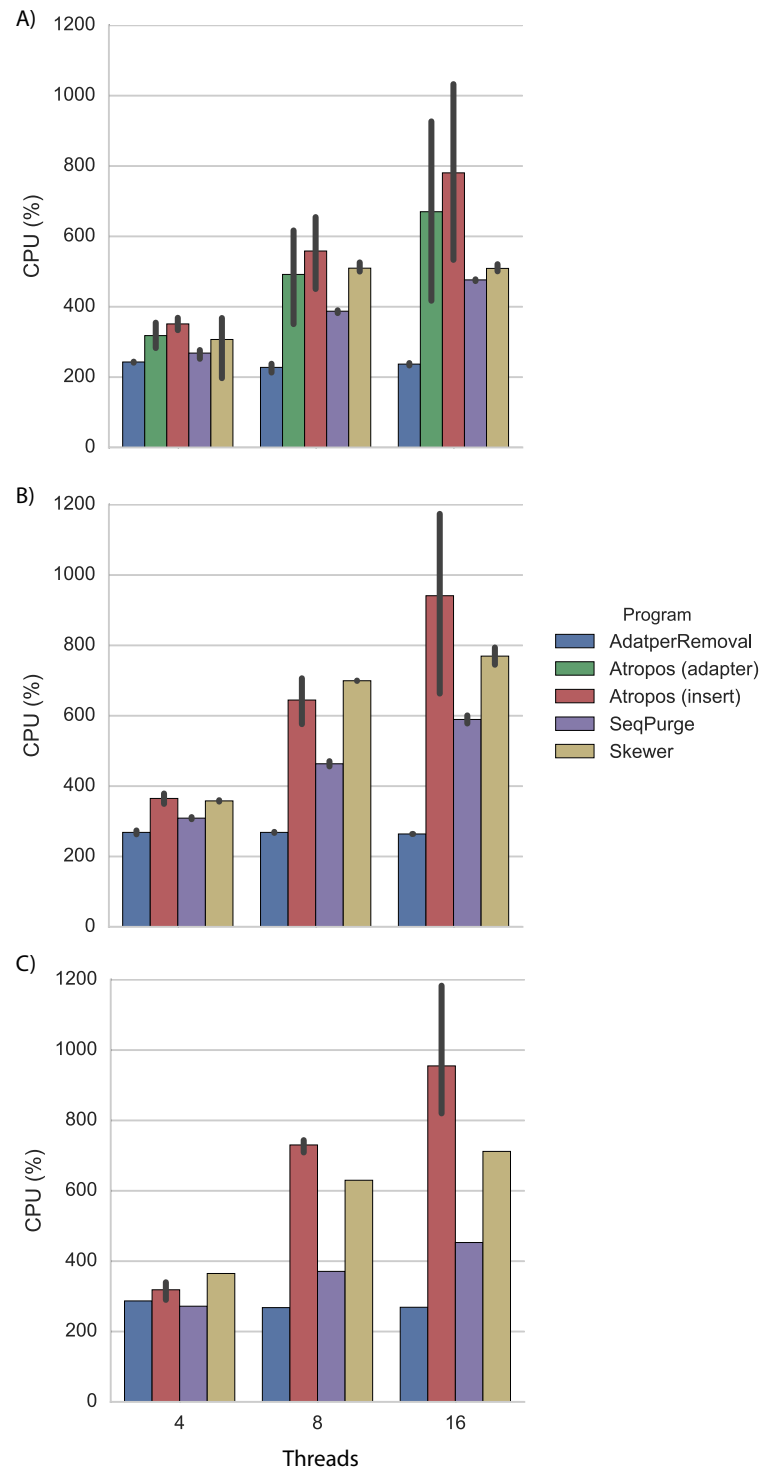

**Figure 2. CPU Utilization of trimming tools.** Average total CPU usage of each trimming tool run on A) simulated data, B) WGBS data, and C) mRNA-Seq data.

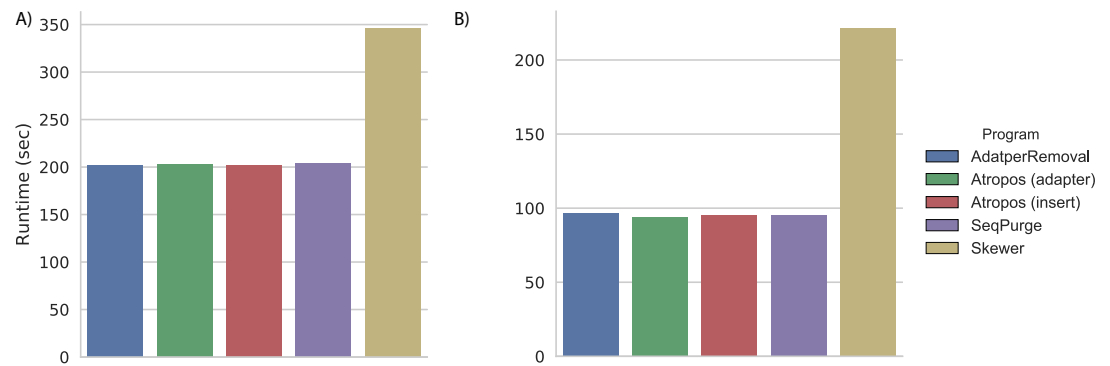

**Figure 3. Mapping execution times.** Execution time of A) bwa-meth on WGBS reads, and B) STAR on mRNA-Seq reads, for reads trimmed by each tool as well as the untrimmed reads.

## 2 TABLES

| Software        | Version                 | Citation                                                                          |
|-----------------|-------------------------|-----------------------------------------------------------------------------------|
| <b>Trimmers</b> |                         |                                                                                   |
| Atropos         | 1.1.5                   | This manuscript                                                                   |
| AdapterRemoval  | 2.2.0                   | Schubert et al. (2016)                                                            |
| SeqPurge        | ngs-bits commit 9e8d99d | Sturm et al. (2016)                                                               |
| Skewer          | 0.2.2                   | Jiang et al. (2014)                                                               |
| <b>Aligners</b> |                         |                                                                                   |
| BWA             | 0.7.15                  | Li (2013)                                                                         |
| bwa-meth        | commit 1c530af          | Pedersen et al. (2014)                                                            |
| Samtools        | 1.4                     | Li et al. (2009)                                                                  |
| STAR            | 2.5.3a                  | Dobin et al. (2013)                                                               |
| <b>Misc</b>     |                         |                                                                                   |
| ART             | 151                     | Huang et al. (2012); Jiang et al. (2014)                                          |
| Bedops          | 2.4.26                  | Neph et al. (2012)                                                                |
| SRA toolkit     | 2.8.2-1                 | <a href="https://github.com/ncbi/sra-tools">https://github.com/ncbi/sra-tools</a> |

**Table 1.** Descriptions of software used in the benchmark workflow.

| Program                      | Execution Time (sec.) |       |
|------------------------------|-----------------------|-------|
|                              | Min                   | Max   |
| AdapterRemoval               | <b>20.31</b>          | 20.54 |
| Atropos (adapter + nowriter) | 32.72                 | 43.45 |
| Atropos (adapter + worker)   | 79.69                 | 82.14 |
| Atropos (adapter + writer)   | 47.54                 | 52.34 |
| Atropos (insert + nowriter)  | 42.21                 | 49.19 |
| Atropos (insert + worker)    | 90.11                 | 96.02 |
| Atropos (insert + writer)    | 49.7                  | 55.01 |
| SeqPurge                     | 22.02                 | 22.73 |
| Skewer                       | 39.03                 | 43.28 |
| CPU Usage (%)                |                       |       |
| AdapterRemoval               | 236                   | 238   |
| Atropos (adapter + nowriter) | 322                   | 332   |
| Atropos (adapter + worker)   | 365                   | 366   |
| Atropos (adapter + writer)   | 223                   | 239   |
| Atropos (insert + nowriter)  | 338                   | 360   |
| Atropos (insert + worker)    | 371                   | 372   |
| Atropos (insert + writer)    | 291                   | 294   |
| SeqPurge                     | 175                   | 178   |
| Skewer                       | 250                   | 259   |

**Table 2.** Min/max execution time and average CPU usage for trimming of simulated datasets on a desktop with 4 parallel threads.

|                              |              | 4 Threads                     | 8 Threads    |       | 16 Threads   |       |
|------------------------------|--------------|-------------------------------|--------------|-------|--------------|-------|
| Program                      |              | Execution Time (Min Max sec.) |              |       |              |       |
| AdapterRemoval               | <b>24.05</b> | 25.68                         | 24.45        | 26.7  | 23.75        | 25.69 |
| Atropos (adapter + nowriter) | 39.15        | 49.45                         | <b>22.03</b> | 31.71 | <b>16.78</b> | 23.9  |
| Atropos (adapter + worker)   | 105.79       | 107.07                        | 58.26        | 71.39 | 31.72        | 32.33 |
| Atropos (adapter + writer)   | 54.93        | 56.59                         | 49.59        | 56.82 | 44.61        | 58.79 |
| Atropos (insert + nowriter)  | 53.17        | 60.92                         | 31.72        | 40.2  | 19.7         | 30.59 |
| Atropos (insert + worker)    | 120.15       | 154.89                        | 63.5         | 81.31 | 35.3         | 36.22 |
| Atropos (insert + writer)    | 61.4         | 78.8                          | 51.71        | 61.7  | 45.56        | 50.66 |
| SeqPurge                     | 37.86        | 42.06                         | 27.12        | 27.83 | 22.13        | 22.54 |
| Skewer                       | 34.37        | 65.44                         | 29.44        | 32.52 | 29.66        | 31.69 |
| CPU Usage (Min Max %)        |              |                               |              |       |              |       |
| AdapterRemoval               | 241          | 244                           | 213          | 238   | 233          | 240   |
| Atropos (adapter + nowriter) | 301          | 360                           | 420          | 634   | 486          | 641   |
| Atropos (adapter + worker)   | 372          | 375                           | 665          | 709   | 1212         | 1228  |
| Atropos (adapter + writer)   | 239          | 245                           | 228          | 237   | 209          | 217   |
| Atropos (insert + nowriter)  | 324          | 374                           | 506          | 708   | 571          | 921   |
| Atropos (insert + worker)    | 373          | 378                           | 705          | 715   | 1229         | 1257  |
| Atropos (insert + writer)    | 317          | 329                           | 338          | 362   | 284          | 316   |
| SeqPurge                     | 252          | 277                           | 382          | 390   | 473          | 478   |
| Skewer                       | 197          | 368                           | 500          | 526   | 496          | 521   |

**Table 3.** Min/max execution time and average CPU usage for trimming of simulated datasets on a cluster node with 4, 8, or 16 parallel threads.

| Program                      | 16 Threads    | 4 Threads    | 8 Threads    |
|------------------------------|---------------|--------------|--------------|
| Error rate 0.2%              |               |              |              |
| AdapterRemoval               | 1401.3        | <b>589.1</b> | <b>854.6</b> |
| Atropos (adapter + nowriter) | <b>359.7</b>  | 2282.8       | 1676.2       |
| Atropos (adapter + worker)   | 3893.3        | 3001.0       | 3241.2       |
| Atropos (adapter + writer)   | 4015.4        | 2166.4       | 2231.8       |
| Atropos (insert + nowriter)  | 1997.9        | 2532.0       | 1564.3       |
| Atropos (insert + worker)    | 4078.1        | 3050.9       | 3366.3       |
| Atropos (insert + writer)    | 4028.8        | 2538.4       | 2769.1       |
| SeqPurge                     | 1530.6        | 719.6        | 989.9        |
| Skewer                       | 1407.0        | 595.0        | 865.7        |
| Error rate 0.6 %             |               |              |              |
| AdapterRemoval               | <b>1397.6</b> | <b>584.8</b> | <b>857.5</b> |
| Atropos (adapter + nowriter) | 4526.3        | 2395.9       | 2302.3       |
| atropos (adapter + worker)   | 3702.2        | 2964.3       | 3282.6       |
| Atropos (adapter + writer)   | 4013.4        | 2059.2       | 2211.6       |
| Atropos (insert + nowriter)  | 3856.3        | 2383.7       | 2626.6       |
| Atropos (insert + worker)    | 3847.8        | 3087.6       | 3413.9       |
| Atropos (insert + writer)    | 4035.8        | 2557.0       | 2742.6       |
| SeqPurge                     | 1530.6        | 719.6        | 989.9        |
| Skewer                       | 1406.8        | 595.0        | 865.5        |
| Error rate 1.2%              |               |              |              |
| AdapterRemoval               | <b>1397.6</b> | <b>583.6</b> | <b>856.4</b> |
| Atropos (adapter + nowriter) | 1998.0        | 2079.2       | 1234.5       |
| Atropos (adapter + worker)   | 3785.6        | 3014.0       | 3362.4       |
| Atropos (adapter + writer)   | 4011.3        | 2263.4       | 2227.9       |
| Atropos (insert + nowriter)  | 1890.0        | 2343.2       | 1976.3       |
| Atropos (insert + worker)    | 3530.3        | 3130.2       | 3405.0       |
| Atropos (insert + writer)    | 4072.1        | 2487.2       | 2216.1       |
| SeqPurge                     | 1530.6        | 719.6        | 989.9        |
| Skewer                       | 1407.2        | 595.2        | 865.8        |

**Table 4.** Memory usage of jobs run on cluster for trimming simulated datasets.

|                             | 4 Threads                     |        | 8 Threads   |       | 16 Threads   |       |
|-----------------------------|-------------------------------|--------|-------------|-------|--------------|-------|
| Program                     | Execution Time (Min Max sec.) |        |             |       |              |       |
| AdapterRemoval              | <b>30.79</b>                  | 31.99  | <b>22.0</b> | 23.14 | <b>23.19</b> | 23.47 |
| Atropos (insert + nowriter) | 93.13                         | 97.77  | 39.81       | 40.18 | 24.57        | 24.65 |
| Atropos (insert + worker)   | 172.34                        | 174.27 | 71.12       | 71.61 | 39.01        | 39.31 |
| Atropos (insert + writer)   | 100.11                        | 102.49 | 51.25       | 53.69 | 45.98        | 46.5  |
| SeqPurge                    | 60.09                         | 60.77  | 37.07       | 37.76 | 30.24        | 31.18 |
| Skewer                      | 56.97                         | 58.27  | 32.64       | 33.1  | 29.2         | 32.11 |
| CPU Usage (Min Max %)       |                               |        |             |       |              |       |
| AdapterRemoval              | 263                           | 274    | 267         | 270   | 264          | 264   |
| Atropos (insert + nowriter) | 372                           | 377    | 688         | 698   | 1003         | 1035  |
| Atropos (insert + worker)   | 382                           | 383    | 713         | 721   | 1299         | 1311  |
| Atropos (insert + writer)   | 336                           | 340    | 504         | 544   | 487          | 512   |
| SeqPurge                    | 306                           | 312    | 456         | 471   | 578          | 601   |
| Skewer                      | 356                           | 360    | 699         | 700   | 745          | 794   |

**Table 5.** Min/max execution time and average CPU usage for trimming of WGBS data on a cluster node with 4, 8, or 16 parallel threads.

|                             | 4 Threads             | 8 Threads    | 16 Threads   |
|-----------------------------|-----------------------|--------------|--------------|
| Program                     | Execution Time (sec.) |              |              |
| AdapterRemoval              | <b>102.0</b>          | <b>98.91</b> | <b>99.71</b> |
| Atropos (insert + nowriter) | 362.12                | 173.54       | 155.11       |
| Atropos (insert + worker)   | 593.21                | 248.34       | 145.78       |
| Atropos (insert + writer)   | 399.53                | 178.98       | 156.22       |
| SeqPurge                    | 232.65                | 178.67       | 140.44       |
| Skewer                      | 203.81                | 153.39       | 129.91       |
|                             | CPU Usage (%)         |              |              |
| AdapterRemoval              | 287                   | 268          | 269          |
| Atropos (insert + nowriter) | 340                   | 744          | 862          |
| Atropos (insert + worker)   | 326                   | 709          | 1183         |
| Atropos (insert + writer)   | 290                   | 738          | 820          |
| SeqPurge                    | 272                   | 371          | 453          |
| Skewer                      | 365                   | 630          | 712          |

**Table 6.** Min/max execution time and average CPU usage for trimming of mRNA-Seq data on a cluster node with 4, 8, or 16 parallel threads.

## REFERENCES

- Dobin, A., Davis, C. A., Schlesinger, F., Drenkow, J., Zaleski, C., Jha, S., Batut, P., Chaisson, M., and Gingeras, T. R. (2013). STAR: ultrafast universal RNA-seq aligner. *Bioinformatics*, 29(1):15–21.
- Huang, W., Li, L., Myers, J. R., and Marth, G. T. (2012). ART: a next-generation sequencing read simulator. *Bioinformatics*, 28(4):593–594.
- Jiang, H., Lei, R., Ding, S.-W., and Zhu, S. (2014). Skewer: a fast and accurate adapter trimmer for next-generation sequencing paired-end reads. *BMC Bioinformatics*, 15:182–None.
- Li, H. (2013). Aligning sequence reads, clone sequences and assembly contigs with BWA-MEM. *arXiv:1303.3997 [q-bio]*. arXiv: 1303.3997.
- Li, H., Handsaker, B., Wysoker, A., Fennell, T., Ruan, J., Homer, N., Marth, G., Abecasis, G., and Durbin, R. (2009). The Sequence Alignment/Map format and SAMtools. *Bioinformatics*, 25(16):2078–2079.
- Neph, S., Vierstra, J., Stergachis, A. B., Reynolds, A. P., Haugen, E., Vernot, B., Thurman, R. E., John, S., Sandstrom, R., Johnson, A. K., Maurano, M. T., Humbert, R., Rynes, E., Wang, H., Vong, S., Lee, K., Bates, D., Diegel, M., Roach, V., Dunn, D., Neri, J., Schafer, A., Hansen, R. S., Kuttyavin, T., Giste, E., Weaver, M., Canfield, T., Sabo, P., Zhang, M., Balasundaram, G., Byron, R., MacCoss, M. J., Akey, J. M., Bender, M. A., Groudine, M., Kaul, R., and Stamatoyannopoulos, J. A. (2012). An expansive human regulatory lexicon encoded in transcription factor footprints. *Nature*, 489(7414):83–90. 00369.
- Pedersen, B. S., Eyring, K., De, S., Yang, I. V., and Schwartz, D. A. (2014). Fast and accurate alignment of long bisulfite-seq reads. *arXiv:1401.1129 [q-bio]*. arXiv: 1401.1129.
- Schubert, M., Lindgreen, S., and Orlando, L. (2016). AdapterRemoval v2: rapid adapter trimming, identification, and read merging. *BMC research notes*, 9:88.
- Sturm, M., Schroeder, C., and Bauer, P. (2016). SeqPurge: highly-sensitive adapter trimming for paired-end NGS data. *BMC Bioinformatics*, 17:208.
